# Supplementary material
Source: PubMed Central journal article supplement (PMC6680135)
Supplement: EMBR-20-e47047-s001.pdf [file EMBR-20-e47047-s001.pdf]

## Expanded View Figures

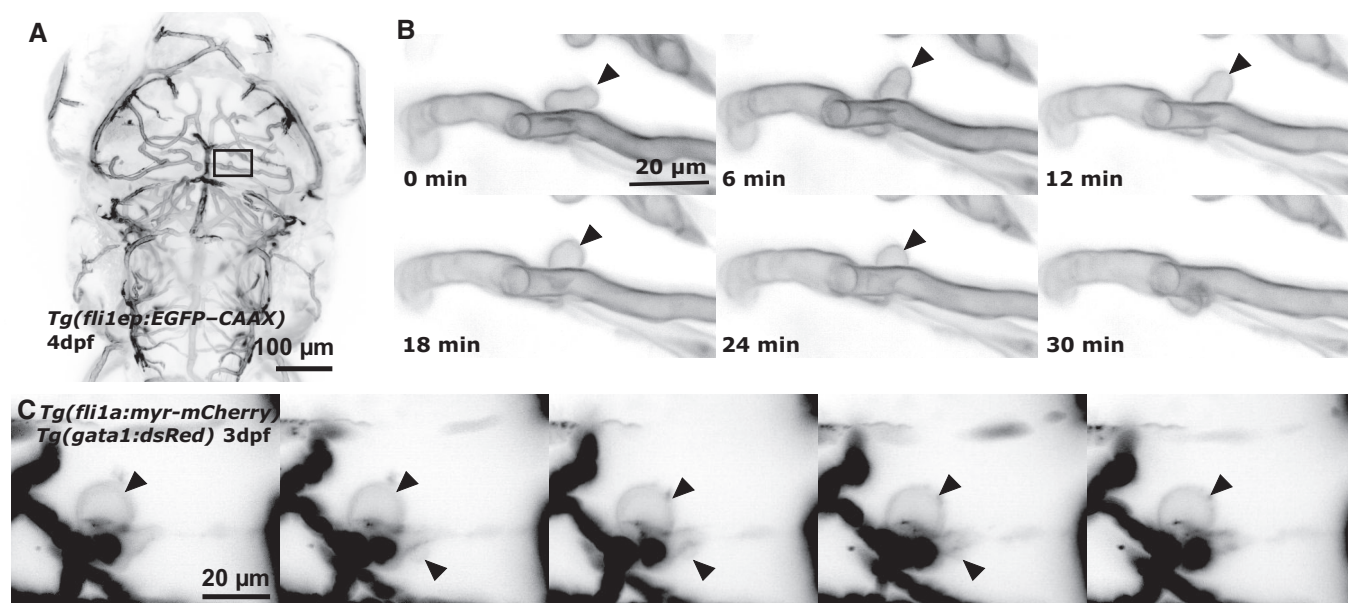

**Figure EV1. Kugeln were observed in the transgenic *Tg(fli1aep:eGFP-CAAX)*.**

A MIP of cerebral vessels of 4 dpf *Tg(fli1aep:eGFP-CAAX)* embryo.

B Time-lapse acquisitions showed that *kugeln* were dynamic (black arrowhead) as in *Tg(kdrl:HRAS-mCherry)<sup>S926</sup>*, showing protrusion, shape changes, oscillation and retraction.

C Additional time-lapse acquisitions in the *Tg(fli1a:myr-mCherry)*, *Tg(gata1:dsRed)* showed equally dynamics of *kugeln* (black arrowhead; images grey LUT; inverted).

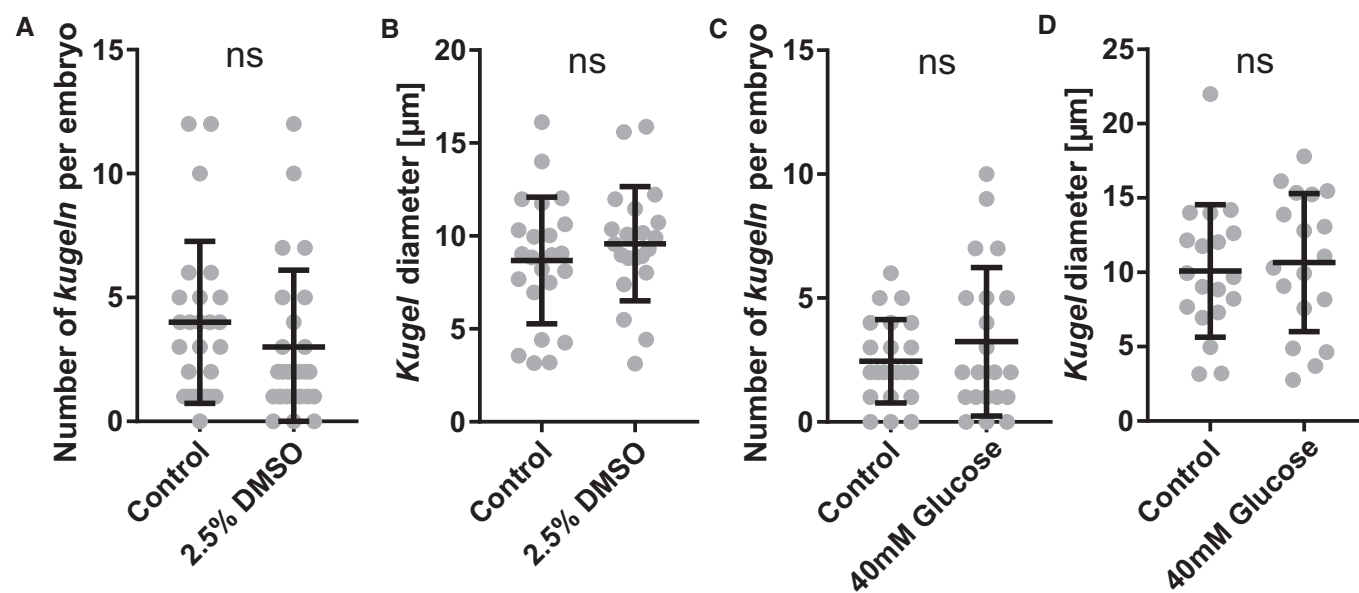

**Figure EV2. *Kugeln* number or diameter is not altered by changes of membrane permeability or osmotic pressure.**

- A The influence of membrane permeability increase was studied by application of DMSO; the number of *kugeln* was not statistically significantly changed (2.5% DMSO 24 h;  $P = 0.1596$ ; control  $n = 25$  embryos  $4.00 \pm 0.65$  (mean  $\pm$  s.e.m.), DMSO  $n = 25$  embryos  $3.00 \pm 0.62$  (mean  $\pm$  s.e.m.); 4 dpf; three experimental repeats; Mann–Whitney  $U$ -test).
- B Diameter of *kugeln* was not statistically significantly different after incubation with DMSO ( $P = 0.3665$ ; control  $n = 97$  *kugeln* from 25 embryos  $8.68 \pm 0.71$  (mean  $\pm$  s.e.m.), DMSO  $n = 75$  *kugeln* from 25 embryos  $9.76 \pm 0.67$  (mean  $\pm$  s.e.m.); 4 dpf; three experimental repeats; Student's  $t$ -test).
- C The impact of osmotic pressure on *kugeln* was studied by application of glucose; no statistically significant difference was observed (40 mM glucose 24 h;  $P = 0.7371$ ; control  $n = 22$  embryos  $2.46 \pm 0.36$  (mean  $\pm$  s.e.m.), glucose  $n = 21$  embryos  $3.24 \pm 0.65$  (mean  $\pm$  s.e.m.); 4 dpf; two experimental repeats; Mann–Whitney  $U$ -test).
- D *Kugel* diameter was not statistically significantly different after incubation with glucose ( $P = 0.7060$ ; control  $n = 54$  *kugeln* from 22 embryos  $10.09 \pm 1.02$  (mean  $\pm$  s.e.m.), glucose  $n = 67$  *kugeln* from 21 embryos  $10.66 \pm 4.65$  (mean  $\pm$  s.e.m.); 4 dpf; two experimental repeats; Student's  $t$ -test).

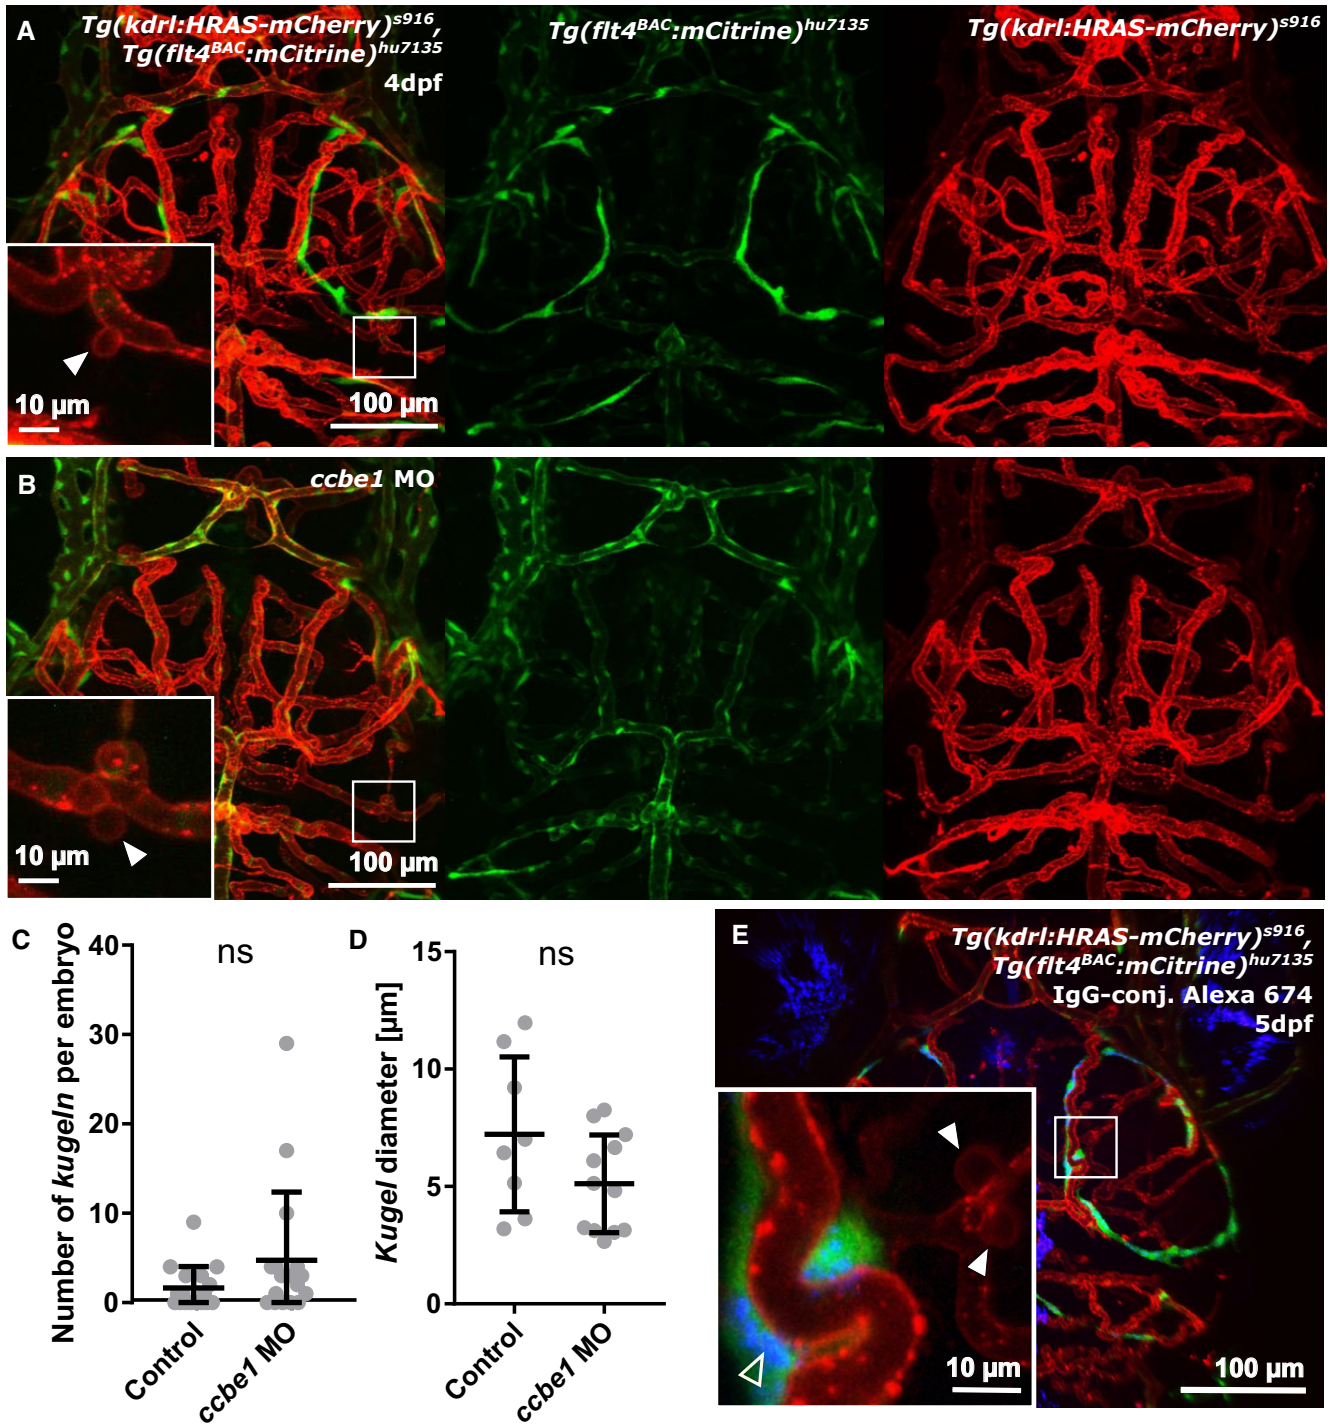

**Figure EV3.** *Kugeln* do not interact with BLECs in *Tg(flt4<sup>BAC</sup>;mCitrine)<sup>hu7135</sup>*, *Tg(kdrl:HRAS-mCherry)<sup>s916</sup>*.

A *Kugeln* (white arrowhead) were additionally studied in the transgenic *Tg(flt4<sup>BAC</sup>;mCitrine)<sup>hu7135</sup>*, *Tg(kdrl:HRAS-mCherry)<sup>s916</sup>*, which was more specific for BLECs, using confocal microscopy to allow higher resolution imaging.

B *Ccbe1* morpholino (MO) injection leads to loss of BLECs, while *kugeln* were still observed (white arrowhead).

C The number of *kugeln* was not statistically significantly altered by *ccbe1* morpholino (MO) knockdown ( $P = 0.1472$ ; control  $n = 17$  embryos  $1.65 \pm 0.58$  (mean  $\pm$  s.e.m.), *ccbe1* MO  $n = 17$  embryos  $4.77 \pm 1.85$  (mean  $\pm$  s.e.m.); 4 dpf; two experimental repeats; Mann–Whitney *U*-test).

D Diameter of *kugeln* was not statistically significantly altered upon *ccbe1* MO injection ( $P = 0.0962$ ; control  $n = 27$  *kugeln* from 17 embryos  $7.22 \pm 1.17$  (mean  $\pm$  s.e.m.), *ccbe1* MO  $n = 81$  *kugeln* from 17 embryos  $5.12 \pm 0.60$  (mean  $\pm$  s.e.m.); two experimental repeats; Student's *t*-test).

E Injection of IgG-conjugated Alexa 647 into the tectum (unfilled arrowhead) showed no uptake of IgG-conjugated Alexa 647 by *kugeln* ( $n = 52$  *kugeln* from 5 5 dpf embryos, *kugeln* indicated by white arrowheads).

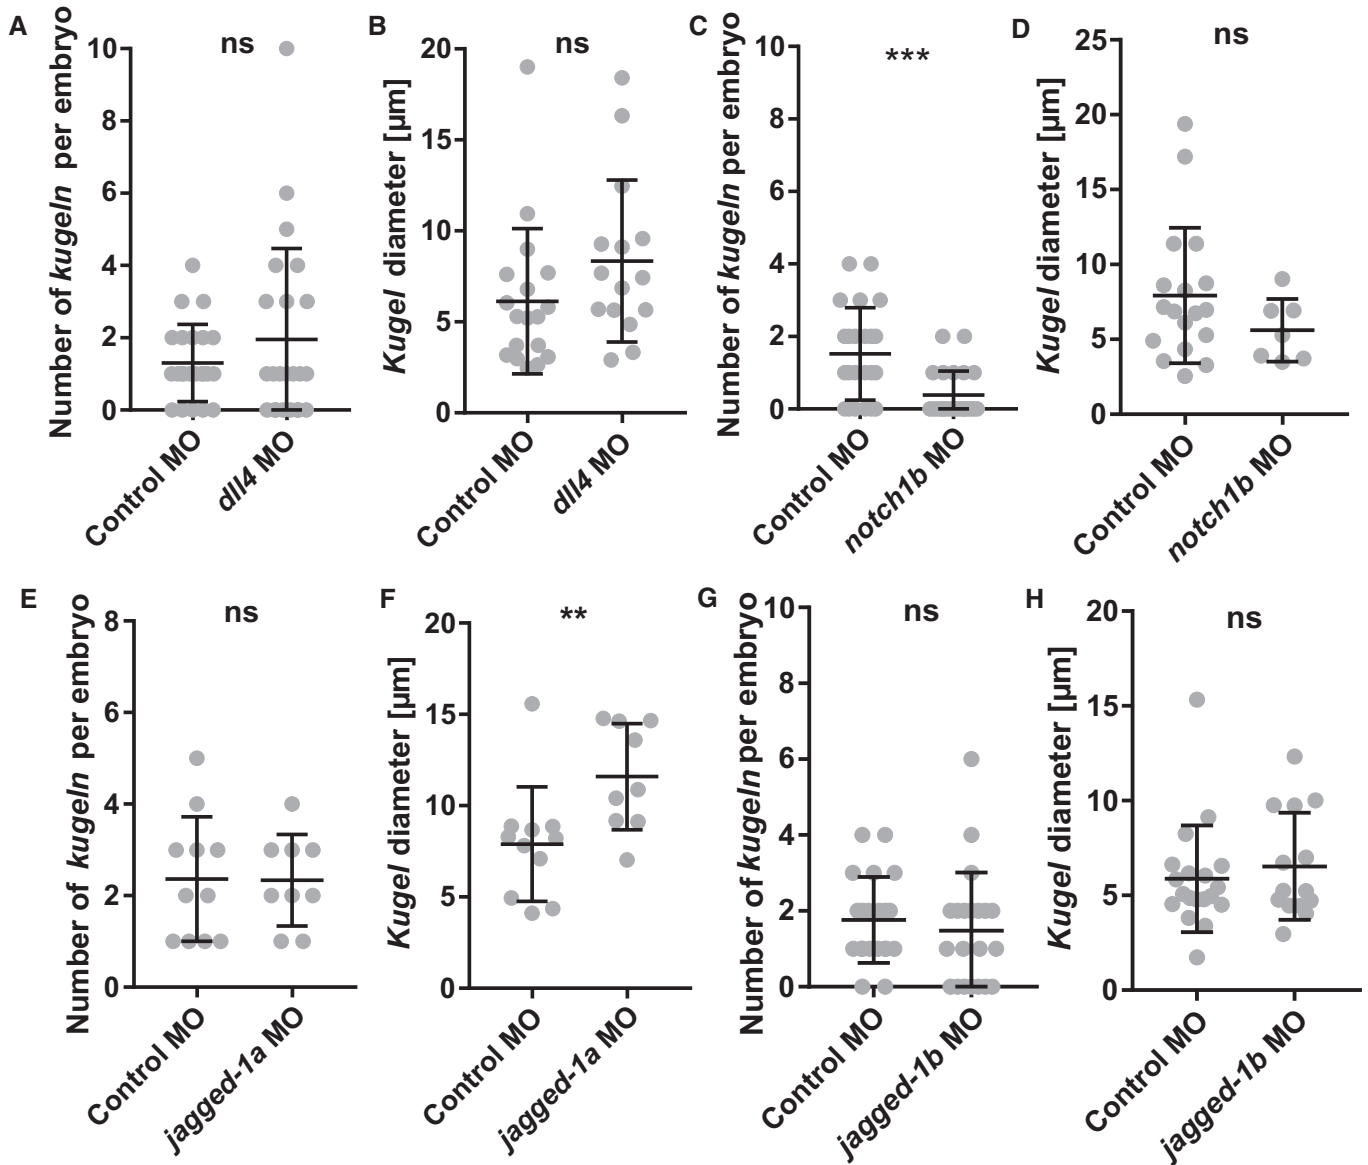

**Figure EV4. The effect of morpholino knockdown of *dll4*, *notch1b*, *jagged-1a* and *jagged-1b* on *kugeln* number and diameter.**

- A Number of *kugeln* per embryo was not statistically significantly changed upon *dll4* MO injection ( $P = 0.9639$ ; control  $n = 23$  embryos  $1.30 \pm 0.22$  (mean  $\pm$  s.e.m.), *dll4* MO  $n = 23$  embryos  $1.96 \pm 0.52$  (mean  $\pm$  s.e.m.); 3 dpf; three experimental repeats; Mann–Whitney *U*-test).
- B *Kugel* diameter was not statistically significantly changed upon *dll4* MO injection ( $P = 0.0843$ ; control  $n = 30$  *kugeln* from 23 embryos  $6.13 \pm 0.94$  (mean  $\pm$  s.e.m.), *dll4* MO  $n = 45$  *kugeln* from 23 embryos  $8.35 \pm 1.15$  (mean  $\pm$  s.e.m.); 3 dpf; three experimental repeats; Mann–Whitney *U*-test).
- C Number of *kugeln* was statistically significantly reduced after *notch1b* MO injection ( $***P = 0.0008$ ; control  $n = 23$  embryos  $1.52 \pm 0.27$  (mean  $\pm$  s.e.m.), *notch1b* MO  $n = 23$  embryos  $0.39 \pm 0.14$  (mean  $\pm$  s.e.m.); 3 dpf; 3 experimental repeats; Mann–Whitney *U*-test).
- D *Kugel* diameter was not statistically significantly changed upon *notch1b* MO injection ( $P = 0.3198$ ; control  $n = 37$  *kugeln* from 23 embryos  $7.93 \pm 1.07$  (mean  $\pm$  s.e.m.), *notch1b* MO  $n = 9$  *kugeln* from 23 embryos  $5.61 \pm 0.79$  (mean  $\pm$  s.e.m.); 3 experimental repeats; Mann–Whitney *U*-test).
- E Number of *kugeln* was not statistically significantly changed after *jagged-1a* MO injection ( $P = 0.9563$ ; control  $n = 11$  embryos  $2.36 \pm 0.41$  (mean  $\pm$  s.e.m.), *jagged-1a* MO  $n = 9$  embryos  $2.33 \pm 0.33$  (mean  $\pm$  s.e.m.); 3 dpf; 2 experimental repeats; Student's *t*-test).
- F *Kugel* diameter was found to be statistically significantly changed upon *jagged-1a* MO injection ( $**P = 0.0097$ ; control  $n = 23$  *kugeln* from 11 embryos  $7.89 \pm 0.94$  (mean  $\pm$  s.e.m.), *jagged-1a* MO  $n = 20$  *kugeln* from 9 embryos  $11.58 \pm 0.97$  (mean  $\pm$  s.e.m.); 3 dpf; 2 experimental repeats; Mann–Whitney *U*-test).
- G Number of *kugeln* per embryo was not statistically significantly changed upon *jagged-1b* MO injection ( $P = 0.3042$ ; control  $n = 21$  embryos  $1.76 \pm 0.25$  (mean  $\pm$  s.e.m.), *jagged-1b* MO  $n = 21$  embryos  $1.48 \pm 0.34$  (mean  $\pm$  s.e.m.); 3 dpf; 3 experimental repeats; Mann–Whitney *U*-test).
- H *Kugel* diameter was not statistically significantly changed upon *jagged-1b* MO injection ( $P = 0.7060$ ; control  $n = 19$  *kugeln* from 21 embryos  $5.88 \pm 0.65$  (mean  $\pm$  s.e.m.), *jagged-1b* MO  $n = 14$  *kugeln* from 21 embryos  $6.53 \pm 0.76$  (mean  $\pm$  s.e.m.); 3 dpf; 3 experimental repeats; Mann–Whitney *U*-test).
